# Supplementary material for: 7F46 コラーゲン線維形成過程における微細構造変化の観測(GS05 ティッシュエンジニアリング)
Source: Springer Nature journal article supplement (doi:10.1007/s40279-018-1008-z), 2012-01-06
Supplement: MOESM1 [file 16214740]

**Electronic Supplementary Material Table S1**. Results of the methodological quality assessment using the modified Downs and Black checklist

| Reporting (items 1-10) | | | | | | | | | | | | External validity (items 11-13) | | | | Internal validity (items 14-26) | | | | | | | | | | | Power, compliance, supervision  (items 27, 28, 29) | | | | | | |
| --- | --- | --- | --- | --- | --- | --- | --- | --- | --- | --- | --- | --- | --- | --- | --- | --- | --- | --- | --- | --- | --- | --- | --- | --- | --- | --- | --- | --- | --- | --- | --- | --- | --- |
| Study | 1 | 2 | 3 | 4 | 5 | 6 | 7 | 8 | 9 | 10 | 11 | | 12 | 13 | 14 | | 15 | 16 | 17 | 18 | 19 | 20 | 21 | 22 | 23 | 24 | | 25 | 26 | 27 | 28 | 29 | Total score |
| Ahtiainen et al. (2009) [6] | 1 | 1 | 1 | 1 | 1 | 1 | 1 | 1 | 1 | 0 | 1 | | 0a | 1 | 0a | | 0a | 1 | 1 | 1 | 0a | 1 | 1 | 0a | 1 | 0a | | 1 | 1 | 1 | 0 | 1 | 21 – G |
| Bell et al. (2000) [36] | 1 | 1 | 1 | 1 | 0 | 1 | 1 | 0 | 1 | 0 | 0a | | 0a | 1 | 0a | | 0a | 1 | 1 | 1 | 0a | 1 | 0a | 0a | 1 | 0a | | 0 | 1 | 1 | 0 | 0a | 15 – M |
| De Souza et al. (2013) [37] | 1 | 1 | 1 | 1 | 1 | 1 | 1 | 0 | 0 | 0 | 1 | | 1 | 1 | 0a | | 1 | 1 | 1 | 1 | 0a | 1 | 1 | 0a | 1 | 0a | | 0 | 1 | 1 | 0 | 0a | 19 – M |
| De Souza et al. (2014) [38] | 1 | 1 | 1 | 1 | 1 | 1 | 1 | 0 | 0 | 0 | 1 | | 1 | 1 | 0a | | 0a | 1 | 1 | 1 | 0a | 1 | 1 | 0a | 1 | 0a | | 0 | 1 | 1 | 0 | 0a | 18 – M |
| Farup et al. (2012) [39] | 1 | 1 | 1 | 1 | 0 | 1 | 1 | 0 | 0 | 0 | 0a | | 0a | 1 | 0a | | 1 | 1 | 1 | 1 | 0a | 1 | 0a | 0a | 1 | 0a | | 0 | 1 | 1 | 0 | 1 | 16 – M |
| Ferrara et al. (2006) [7] | 1 | 1 | 1 | 1 | 1 | 1 | 1 | 1 | 0 | 0 | 1 | | 1 | 1 | 0a | | 0a | 1 | 1 | 1 | 1 | 1 | 1 | 0a | 0 | 0a | | 1 | 1 | 0 | 1 | 0a | 20 – M |
| Hepple et al. (1997) [40] | 1 | 1 | 1 | 1 | 0 | 1 | 1 | 0 | 1 | 0 | 0a | | 0a | 1 | 0a | | 1 | 1 | 1 | 1 | 0a | 1 | 0a | 0a | 1 | 0a | | 0 | 1 | 1 | 0 | 0a | 16 – M |
| Hudelmaier et al. (2010) [18] | 1 | 1 | 1 | 1 | 0 | 1 | 1 | 0 | 0 | 1 | 1 | | 1 | 1 | 0a | | 0a | 1 | 1 | 1 | 0a | 1 | 1 | 0a | 1 | 0a | | 0 | 1 | 1 | 0 | 1 | 19 – M |
| Izquierdo et al. (2004) [20] | 1 | 1 | 1 | 1 | 0 | 1 | 1 | 0 | 1 | 0 | 0a | | 0a | 1 | 0a | | 0a | 1 | 1 | 1 | 1 | 1 | 0a | 0a | 1 | 0a | | 0 | 1 | 1 | 1 | 1 | 18 – M |
| Izquierdo et al. (2005) [19] | 1 | 1 | 1 | 1 | 0 | 1 | 1 | 0 | 1 | 0 | 0a | | 0a | 1 | 0a | | 0a | 1 | 1 | 1 | 1 | 1 | 0a | 0a | 1 | 0a | | 0 | 1 | 1 | 1 | 1 | 18 – M |
| Jubrias et al. (2001) [41] | 1 | 1 | 1 | 1 | 1 | 1 | 1 | 1 | 1 | 0 | 0a | | 0a | 1 | 0a | | 0a | 1 | 1 | 1 | 1 | 1 | 0a | 0a | 1 | 0a | | 1 | 1 | 1 | 1 | 0a | 20 – M |
| Karavirta et al. (2011) [42] | 1 | 1 | 1 | 1 | 0 | 1 | 1 | 0 | 0 | 1 | 1 | | 0 | 1 | 0a | | 0a | 1 | 1 | 1 | 0a | 1 | 1 | 0a | 1 | 0a | | 0 | 1 | 1 | 1 | 1 | 19 – M |
| Kraemer et al. (1995) [23] | 1 | 1 | 1 | 1 | 1 | 1 | 1 | 0 | 0 | 0 | 1 | | 0 | 1 | 0a | | 0a | 1 | 1 | 1 | 1 | 1 | 1 | 0a | 1 | 0a | | 1 | 1 | 1 | 1 | 1 | 21 – G |
| McCarthy et al. (2002) [43] | 1 | 1 | 1 | 1 | 0 | 1 | 1 | 0 | 1 | 1 | 0 | | 0 | 1 | 0a | | 1 | 1 | 1 | 1 | 1 | 1 | 0a | 0a | 1 | 0a | | 0 | 1 | 1 | 1 | 1 | 20 – M |
| Mikkola et al. (2012) [21] | 1 | 1 | 1 | 1 | 0 | 1 | 1 | 0 | 0 | 0 | 0a | | 0 | 1 | 0a | | 0a | 1 | 1 | 1 | 1 | 1 | 0a | 0a | 0a | 0a | | 0 | 1 | 1 | 1 | 1 | 16 – M |
| Nelson et al. (1990) [24] | 1 | 1 | 1 | 1 | 0 | 1 | 1 | 0 | 0 | 0 | 0 | | 0 | 1 | 0a | | 0a | 1 | 1 | 1 | 0a | 1 | 0a | 0a | 1 | 0a | | 0 | 1 | 1 | 0 | 1 | 15 – M |
| Pohleman et al. (2000) [9] | 1 | 1 | 1 | 1 | 0 | 1 | 1 | 1 | 0 | 0 | 1 | | 1 | 1 | 0a | | 0a | 1 | 1 | 1 | 1 | 1 | 1 | 0a | 1 | 0a | | 0 | 1 | 0 | 1 | 1 | 20 – M |
| Sillanpää et al. (2008) [8] | 1 | 1 | 1 | 1 | 0 | 1 | 1 | 0 | 0 | 1 | 1 | | 0 | 1 | 0a | | 0a | 1 | 1 | 1 | 1 | 1 | 1 | 0a | 1 | 0a | | 0 | 1 | 1 | 1 | 1 | 20 – M |
| Sipila and Suominen (1995) [44] | 1 | 1 | 1 | 1 | 0 | 1 | 1 | 1 | 0 | 1 | 1 | | 1 | 1 | 0a | | 0a | 1 | 1 | 1 | 1 | 1 | 1 | 0a | 1 | 0a | | 0 | 1 | 1 | 1 | 1 | 22 – G |
| Sipila et al. (1997) [45] | 1 | 1 | 1 | 1 | 0 | 1 | 1 | 1 | 0 | 1 | 1 | | 1 | 1 | 0a | | 0a | 1 | 1 | 1 | 1 | 1 | 1 | 0a | 1 | 0a | | 0 | 1 | 1 | 1 | 1 | 22 – G |
| Willis et al. (2012) [33] | 1 | 1 | 1 | 1 | 1 | 1 | 1 | 0 | 0 | 1 | 1 | | 1 | 1 | 0a | | 1 | 1 | 1 | 1 | 1 | 1 | 1 | 0a | 1 | 0a | | 1 | 1 | 1 | 1 | 1 | 24 – G |
| 1 = criteria met; 0 = criteria not met; a = item was unable to be determined, scored 0; *G* good quality, *M* moderate quality | | | | | | | | | | | | | | | | | | | | | | | | | | | | | | | | | |
